# Supplementary material for: Synergistic effect of ZnO nanoparticles and triblock copolymer surfactant on the dynamic and equilibrium oil–water interfacial tension
Source: Royal Society of Chemistry journal article supplement (doi:10.1039/c4sm01027b), 2014-06-18
Supplement: c4sm01027b1.pdf [file c4sm01027b1.pdf]

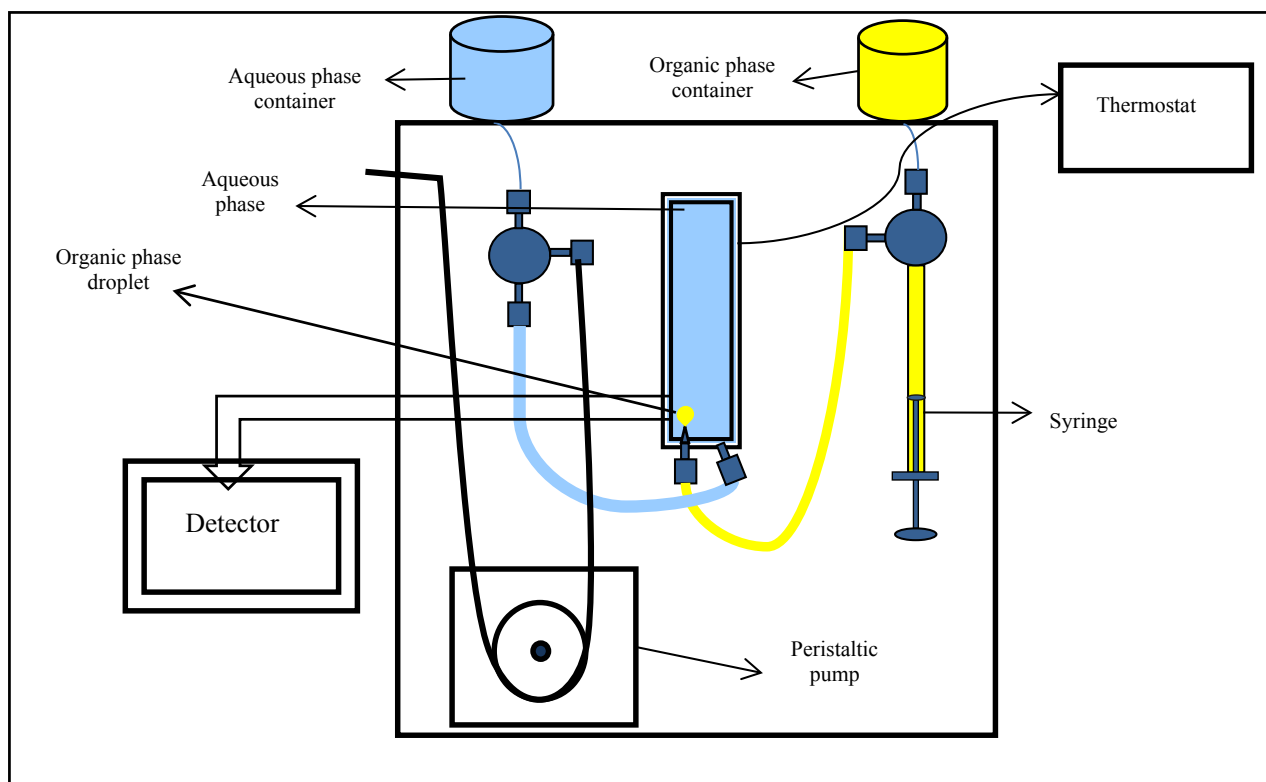

Figure S1. The schematic of the experimental set-up (drop volume tensiometer).

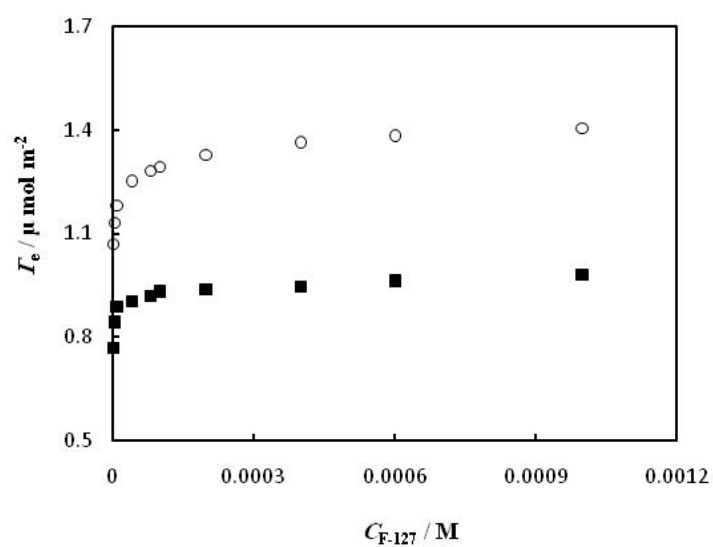

Figure S2. Equilibrium surface concentration vs. F-127 bulk concentration in the absence  $\circ$  and presence  $\blacksquare$  of 0.01 wt% ZnO nanoparticles at 25 °C.

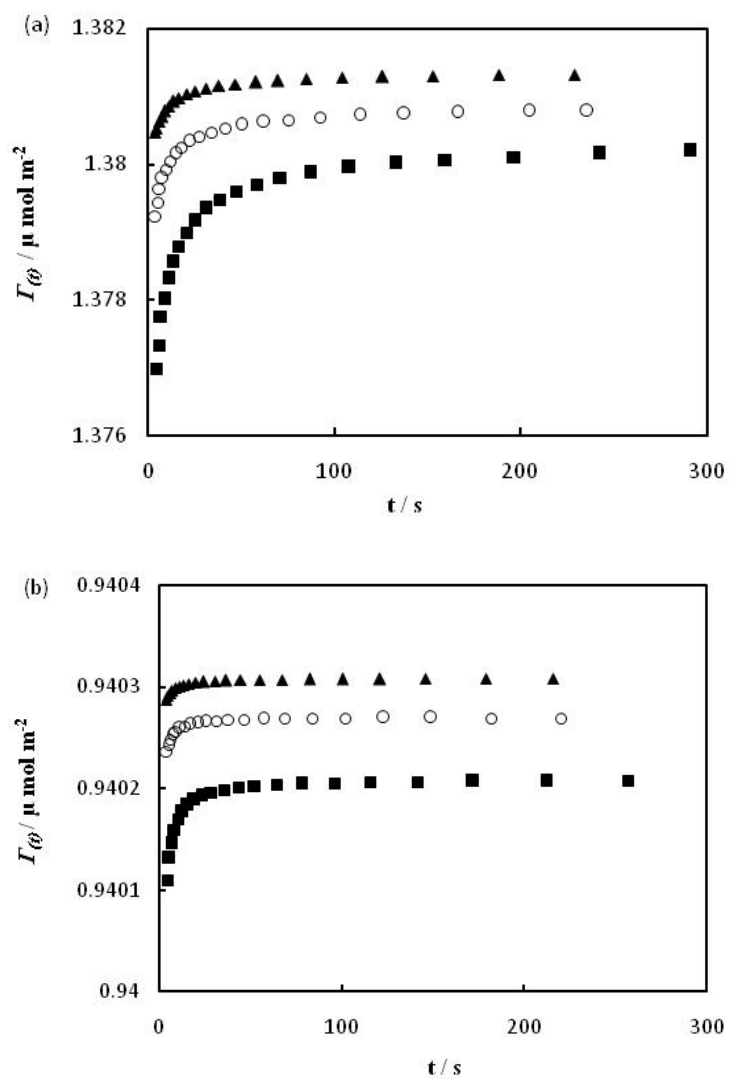

**Figure S3.** Dynamic surface concentration vs. time at different F-127 concentrations, 0.0001 ■, 0.00008 ○ and 0.00004 ▲, M. (a) in the absence and (b) in the presence of 0.01 wt% ZnO nanoparticles at 25 °C.

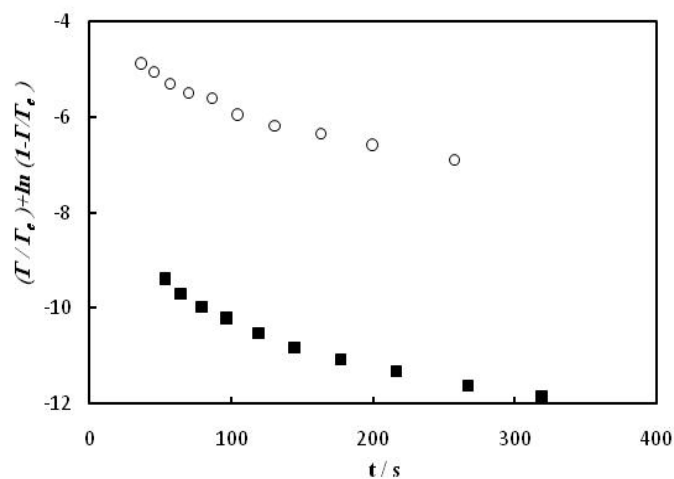

**Figure S4.** The plot of  $(\Gamma/\Gamma_e) + \ln(1 - \Gamma/\Gamma_e)$  vs. time for close to equilibrium data at  $C_{F-127} = 0.00001$  M, in the absence  $\circ$  and in the presence  $\blacksquare$ , of 0.01 wt% ZnO nanoparticles at 25 °C.

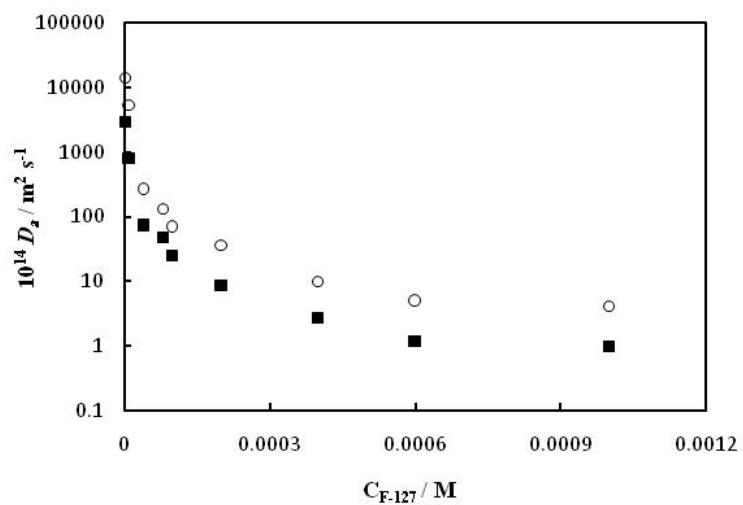

**Figure S5.** Apparent diffusion coefficient  $D_a$  vs. F-127 bulk concentration in the absence  $\circ$  and presence  $\blacksquare$  of ZnO nanoparticles at 25 °C.

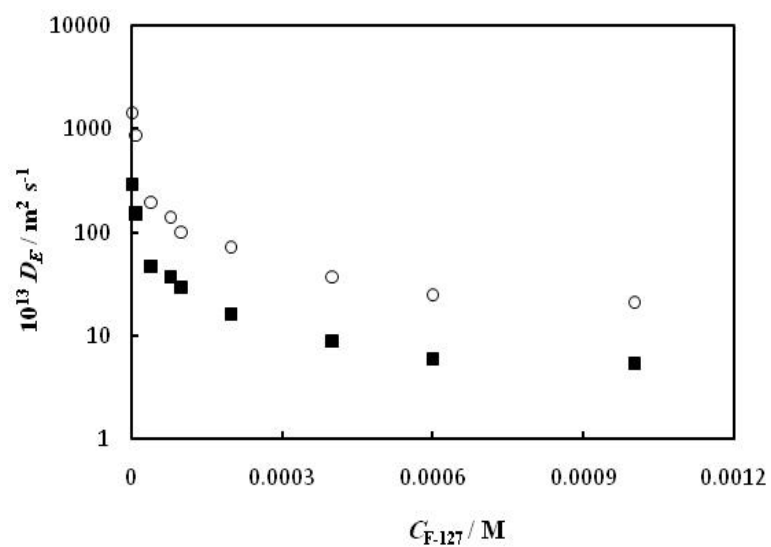

**Figure S6.** Effective diffusion coefficient  $D_E$  vs. F-127 bulk concentration in the absence  $\circ$  and presence  $\blacksquare$  of ZnO nanoparticles at 25 °C.

(a)

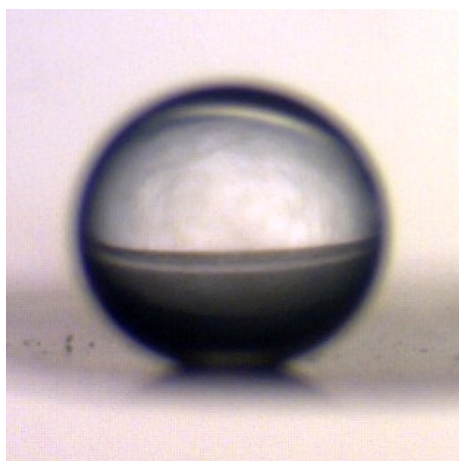

(b)

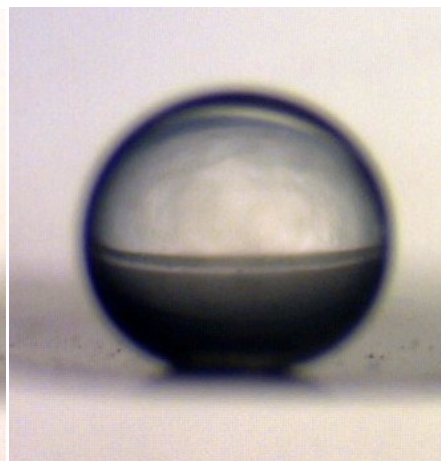

**Figure S7.** The images of aqueous phase drop covered by n-decane at a quartz substrate at two F-127 concentrations (a) 0.00004 (b) 0.0001 M.
